# Supplementary material
Source: PubMed Central journal article supplement (PMC8355063)
Supplement: NIHMS1718590-supplement-1.pdf [file NIHMS1718590-supplement-1.pdf]

**Supplementary information**

Please report pilot data in detail here and include any other material that provides background information.

**Table A1: correlation coefficients for difference scores in visual search accuracy for the pilot data.**

|         | Disgust | Fear  | Happy | Sad   |
|---------|---------|-------|-------|-------|
| Disgust | 1       | 0.045 | 0.006 | 0.078 |
| Fear    | 0.045   | 1     | 0.007 | 0.002 |
| Happy   | 0.006   | 0.007 | 1     | 0.146 |
| Sad     | 0.078   | 0.002 | 0.146 | 1     |

**Table A2: correlation coefficients for difference scores in emotion identification accuracy for the pilot data.**

|         | Disgust | Fear  | Happy  | Sad    |
|---------|---------|-------|--------|--------|
| Disgust | 1       | 0.092 | -0.037 | -0.121 |
| Fear    | 0.092   | 1     | 0.144  | 0.065  |
| Happy   | -0.037  | 0.144 | 1      | 0.088  |
| Sad     | -0.121  | 0.065 | 0.088  | 1      |
